# Supplementary material
Source: Springer Nature journal article supplement (https://www.springermedizin.de/resource/supplementary/13075_2011_3578_MOESM1_ESM.pdf/9694844)

**A**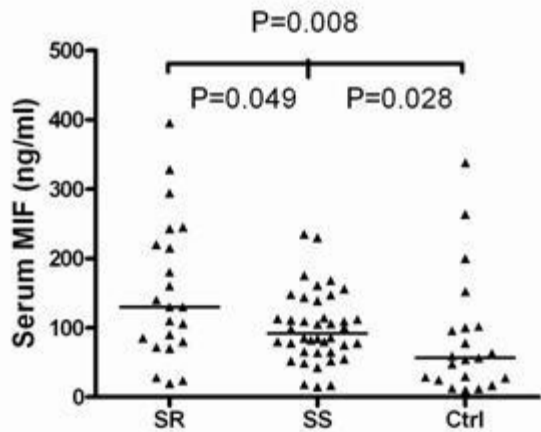**B**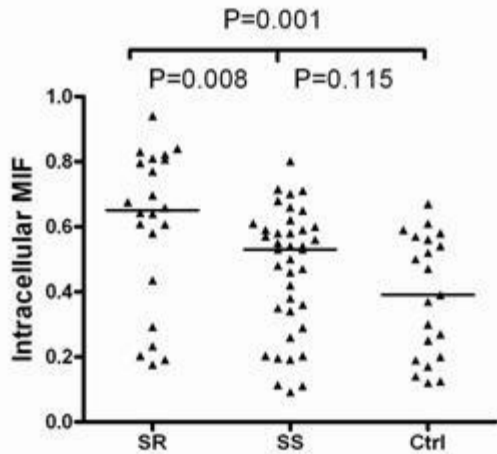

Supplement: MOESM1 [file 9694844]
